# Supplementary material
Source: publisher figshare collection journal article supplement (https://gsajournals.figshare.com/articles/dataset/_/9989801)
Supplement: Supplementary file 1 [file 1]

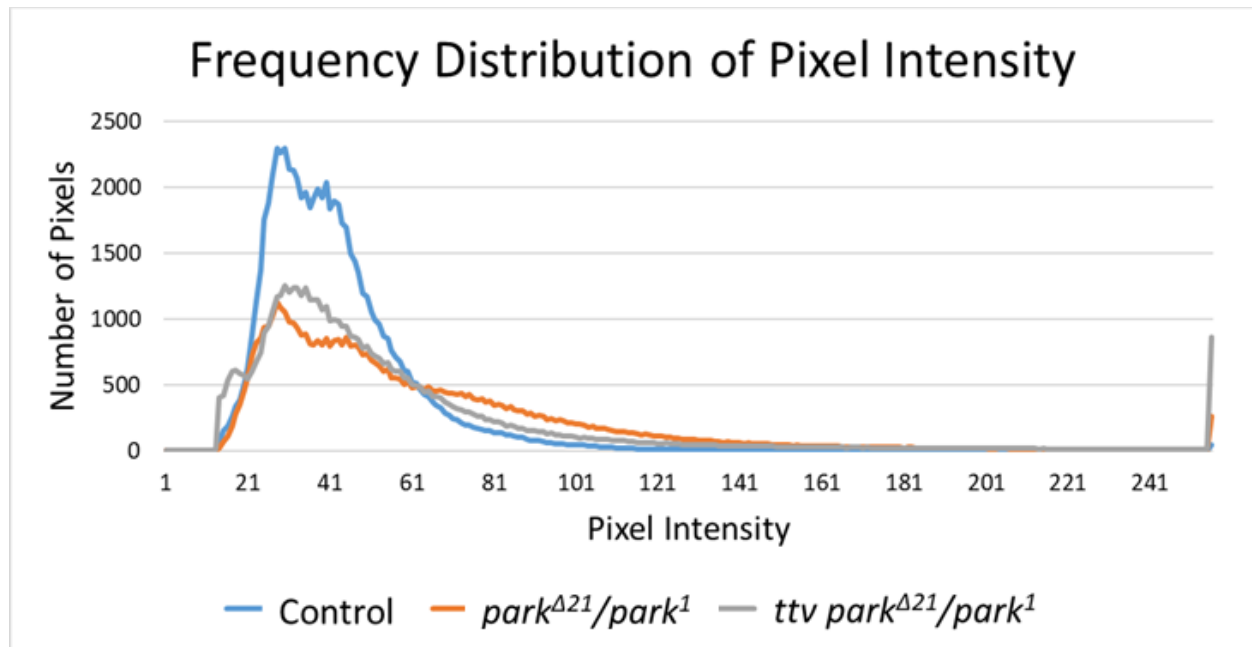

**Figure S1. Frequency distribution of pixel intensities for anti-ubiquitin staining in flight muscles of *parkin* mutants and *ttv*/*+*; *park*<sup>Δ21</sup>/*park*<sup>1</sup> animals.** The frequency plots represent the averages of three independent experiments, with n=15 for each genotype. Note that *park*<sup>Δ21</sup>/*park*<sup>1</sup> animals showed a shift, with more pixels with elevated brightness or intensity compared to controls (*park*<sup>1</sup>/*+*). The distribution of pixel intensities is shifted toward the control distribution when animals are heterozygous for *ttv* (*ttv*<sup>00681</sup>/*+*; *park*<sup>Δ21</sup>/*park*<sup>1</sup>). The frequency distribution of *park*<sup>Δ21</sup>/*park*<sup>1</sup> is significantly different from *ttv*<sup>00681</sup>/*+*; *park*<sup>Δ21</sup>/*park*<sup>1</sup> ( $p < 0.001$ , Wilcoxon Signed Ranked Median Test).
