# Supplementary material
Source: publisher figshare collection journal article supplement (https://gsajournals.figshare.com/articles/dataset/_/9989801)
Supplement: Supplementary file 2 [file 1]

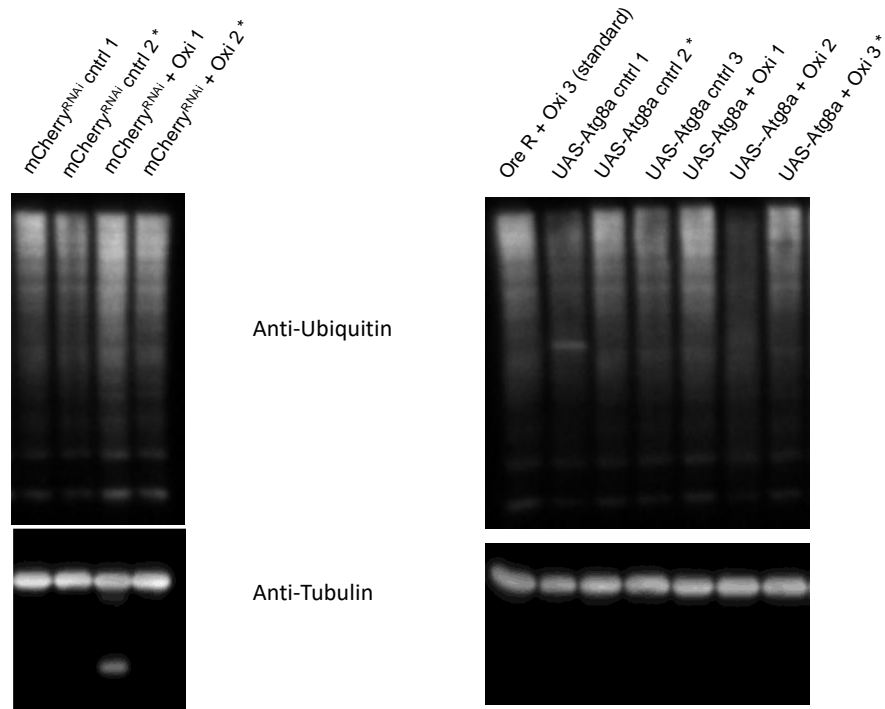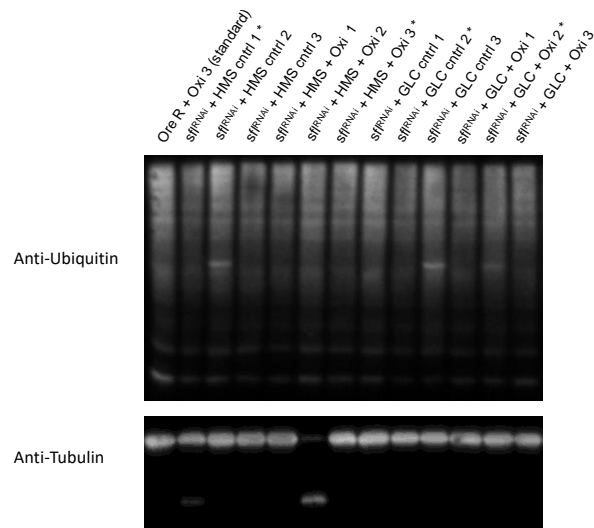

**Figure S3. Western blots used for assembly of data in Figure 4.**

Images of original western blots used for lanes shown in Figure 4. Lanes with \* are the ones placed in Figure 4. Anti-ubiquitin (top panel) and anti-tubulin (bottom panels) probes of the same blots are shown. Cntrl label represents samples without peroxide exposure, + Oxi indicates animals that received peroxide exposure. Replicates are numbered. For these three blots from this one experiments, one standard sample was run on all gels permitting direct comparison across the gels by normalizing to this one sample.
