# Supplementary material
Source: publisher figshare collection journal article supplement (https://gsajournals.figshare.com/articles/dataset/_/9989801)
Supplement: Supplementary file 3 [file 1]

**Table S1. Analysis of heparan sulfate levels and structure in *sfl* and *ttv* heterozygotes**

|                                | Total amount<br>ng/mg dry<br>tissue | Unsaturated disaccharide       |      |       |      |      |        |
|--------------------------------|-------------------------------------|--------------------------------|------|-------|------|------|--------|
|                                |                                     | NAc                            | NS   | NAc6S | NS6S | 2SNS | 2SNS6S |
|                                |                                     | % change compared to wild type |      |       |      |      |        |
| OreR (wild type)               | 12.8                                |                                |      |       |      |      |        |
| <i>slf</i> <sub>03844</sub> /+ | 10.1                                | -2%                            | -18% | -8%   | -12% | -19% | 6%     |
| <i>slf</i> <sub>9B4</sub> /+   | 10.1                                | -8%                            | -21% | -7%   | -7%  | -21% | -4%    |
| <i>ttv</i> <sub>00681</sub> /+ | 7.9                                 | -32%                           | -35% | -23%  | -23% | -30% | -21%   |

Table legend. Each sample represents the average of samples containing 50 females and 50 adult males, where total heparan sulfate was purified and measured using a disaccharide profiling method described previously (Toyoda et al. 2000b). Abbreviations: **NAc** = 2-acetamido-2-deoxy-4-*O*-(4-deoxy- $\alpha$ -L-*threo*-hex-enepyransyluronic acid)-D-glucose ( $\Delta$ UA-GlcNAc), **NS** = 2-deoxy-2-sulfamido-4-*O*-(4-deoxy- $\alpha$ -L-*threo*-hex-enepyransyluronic acid)-D-glucose ( $\Delta$ UA-GlcNS), **NAc6S** = 2-acetamido-2-deoxy-4-*O*-(4-deoxy- $\alpha$ -L-*threo*-hex-enepyransyluronic acid)-6-*O*-sulfo-D-glucose ( $\Delta$ UA-GlcNAc6S), **NS6S** = 2-deoxy-2-sulfamido-4-*O*-(4-deoxy-2-*O*-sulfo- $\alpha$ -L-*threo*-hex-enepyransyluronic acid)-6-*O*-sulfo-D-glucose ( $\Delta$ UA-GlcNS6S), **2SNS** = 2-deoxy-2-sulfamido-4-*O*-(4-deoxy-2-*O*-sulfo- $\alpha$ -L-*threo*-hex-enepyransyluronic acid)-D-glucose ( $\Delta$ UA2S-GlcNS), **2SNS6S** = 2-deoxy-2-sulfamido-4-*O*-(4-deoxy-2-*O*-sulfo- $\alpha$ -L-*threo*-hex-enepyransyluronic acid)-6-*O*-sulfo-D-glucose ( $\Delta$ UA2S-GlcNS6S).
