# Supplementary material
Source: publisher figshare collection journal article supplement (https://gsajournals.figshare.com/articles/dataset/_/9989801)
Supplement: Supplementary file 4 [file 1]

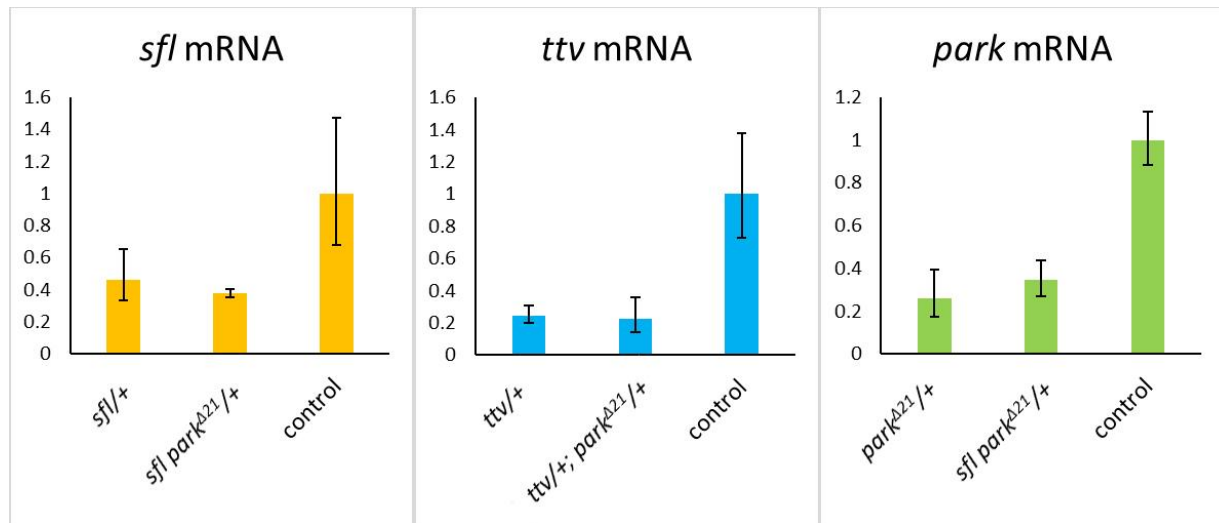

### Figure S2. QPCR analysis

Quantitative PCR analysis of *sfl*, *ttv*, and *park* mRNA. The left panel shows the levels of *sfl* mRNA in animals bearing a *sfl*<sup>03844</sup> null allele recombined onto a *park*<sup>Δ21</sup> bearing chromosome. Middle and right panels show the levels of *ttv* and *park* mRNA levels in animals used for the genetic interaction experiments described. Control animals were *UAS-WRNAi* (without any *Gal4* driver) that had been used as a control in a number of the RNAi experiments.
